# Supplementary material for: A Systematic Review of Systematic Reviews on the Epidemiology, Evaluation, and Treatment of Plantar Fasciitis
Source: MDPI journal article supplement (doi:10.3390/life11121287), 2021-11-24
Supplement: s1 [file s1]

## **Search Strategy**

### **PUBMED**

Search terms: "Fasciitis, Plantar"[Mesh] OR plantar heel pain[tw] OR plantar fasci\*[tw]  
AND  
"systematic review"[pt] OR systematic[ti] OR "meta-analysis"[pt] OR meta\*[tw]

Total Results: 390

### **EMBASE**

('plantar fasciitis'/exp OR 'plantar fasciopathy'/exp OR 'plantar heel pain'/exp OR 'plantar fasci\*':ab,ti,kw)  
AND  
'systematic review'/exp OR 'meta analysis'/exp OR systematic: ab,ti,kw OR meta\*:ab,ti,kw  
AND  
[embase]/lim OR [embase classic]/lim

Total Results: 395

### **Web of Science**

"plantar fasciitis" OR "plantar fasciopathy" OR "plantar heel pain" OR "plantar fasci\*"  
AND  
"Systematic review" OR "meta-analysis" OR systematic OR meta\*

Total Results: 246

### **Cochrane Library**

1. MeSH Fasciitis, Plantar
2. 'plantar fasci\*' OR 'plantar heel pain' or 'heel spur'
3. 'systematic review' OR 'meta-analysis'
4. #1 OR #2
5. #4 AND #3

Total Results: 43
